# Supplementary material
Source: PubMed Central journal article supplement (PMC6956529)
Supplement: supp_REV119.008583_144493_2_supp_419588_q03n1n.pdf [file supp_REV119.008583_144493_2_supp_419588_q03n1n.pdf]

Changing of the guard: subverting the host immune response by recombination-mediated changes in a major surface antigen in the Lyme disease spirochete

**George Chaconas<sup>1,2,3\*</sup>, Mildred Castellanos<sup>1,3</sup> and Theodore B. Verhey<sup>1,3</sup>**

Supporting Information:

Table S1

Figure S1

| Table S1. Accession numbers related to Figures 3 and S1. |        |               |                               |        |             |        |               |                             |                 |               |
|----------------------------------------------------------|--------|---------------|-------------------------------|--------|-------------|--------|---------------|-----------------------------|-----------------|---------------|
| Strain                                                   | Region | Accession     | Strain                        | Region | Accession   | Region | Accession     | Strain                      | Region          | Accession     |
| <i>B. burgdorferi</i> MM1                                | RecA   | CP031412.1    | <i>B. burgdorferi</i> 156a    | OspC   | CP001271.1  | VlsE   | CP001262.1    | <i>B. burgdorferi</i> B31   | Inverted Repeat | AF314755.1    |
| <i>B. burgdorferi</i> PAbe                               | RecA   | NZ_CP019916.1 | <i>B. burgdorferi</i> 297     | OspC   | NC_018983.1 | VlsE   | AB041949.1    | <i>B. burgdorferi</i> PAbe  | Inverted Repeat | CP019923.1    |
| <i>B. burgdorferi</i> PAli                               | RecA   | NZ_CP019844.1 | <i>B. burgdorferi</i> B31     | OspC   | AE000792.1  | VlsE   | U76405        | <i>B. burgdorferi</i> BL206 | Inverted Repeat | MN066559      |
| <i>B. burgdorferi</i> CA382                              | RecA   | NC_022048.1   | <i>B. burgdorferi</i> JD1     | OspC   | NC_017395.1 | VlsE   | MH509399      | <i>B. burgdorferi</i> JD1   | Inverted Repeat | MH509399      |
| <i>B. burgdorferi</i> Z57                                | RecA   | CP001205.1    | <i>B. burgdorferi</i> MM1     | OspC   | CP031398.1  | VlsE   | CP031409.1    | <i>B. burgdorferi</i> 297   | Inverted Repeat | MN066558      |
| <i>B. burgdorferi</i> JD1                                | RecA   | NC_017403.1   | <i>B. burgdorferi</i> PBoe    | OspC   | AJ749598.1  | VlsE   | AJ850089.1    | <i>B. burgdorferi</i> MM1   | Inverted Repeat | CP031409.1    |
| <i>B. burgdorferi</i> N40                                | RecA   | NC_017418.1   | <i>B. burgdorferi</i> PBre    | OspC   | AJ749599.1  | VlsE   | AJ630107.1    | <i>B. garinii</i> Ip90      | Inverted Repeat | MN066557      |
| <i>B. burgdorferi</i> B331                               | RecA   | NZ_CP017201.1 | <i>B. burgdorferi</i> PKa2    | OspC   | EF537420.1  | VlsE   | AJ630111.1    | <i>B. mayonii</i> MN14-1420 | Inverted Repeat | NZ_CP015790.1 |
| <i>B. burgdorferi</i> B31                                | RecA   | NC_001318.1   | <i>B. burgdorferi</i> WI91-23 | OspC   | CP001446.1  | VlsE   | CP001448.1    | <i>B. mayonii</i> MN14-1539 | Inverted Repeat | NZ_CP015805.1 |
| <i>B. bissetti</i> DN127                                 | RecA   | NC_015921.1   | <i>B. garinii</i> Far04       | OspC   | CP001319.1  | VlsE   | CP001316.1    |                             |                 |               |
| <i>B. afzelii</i> PKo                                    | RecA   | NC_017238.1   | <i>B. mayonii</i> MN14-1420   | OspC   | KR154297.1  | VlsE   | NZ_CP015790.1 |                             |                 |               |
| <i>B. afzelii</i> TOM3107                                | RecA   | NZ_CP009212.1 | <i>B. mayonii</i> MN14-1539   | OspC   | KR154294.1  | VlsE   | NZ_CP015805.1 |                             |                 |               |
| <i>B. afzelii</i> HLJ01                                  | RecA   | NC_018887.1   | <i>B. spielmanii</i> A14S     | OspC   | CP001467.1  | VlsE   | AM993151.1    |                             |                 |               |
| <i>B. afzelii</i> K78                                    | RecA   | NZ_CP009058.1 | <i>B. spielmanii</i> PHap     | OspC   | AM158269.1  | VlsE   | AM993152.1    |                             |                 |               |
| <i>B. afzelii</i> BO23                                   | RecA   | NZ_CP018262.1 | <i>B. spielmanii</i> PMew     | OspC   | AM158270.1  | VlsE   | AM993153.1    |                             |                 |               |
| <i>B. garinii</i> 20047                                  | RecA   | NZ_CP028861.1 |                               |        |             |        |               |                             |                 |               |
| <i>B. garinii</i> Vir                                    | RecA   | CP003151.1    |                               |        |             |        |               |                             |                 |               |
| <i>B. garinii</i> SZ                                     | RecA   | NZ_CP007564.1 |                               |        |             |        |               |                             |                 |               |
| <i>B. garinii</i> NMJW1                                  | RecA   | CP003866.1    |                               |        |             |        |               |                             |                 |               |
| <i>B. chilensis</i> VA1                                  | RecA   | CP009910.1    |                               |        |             |        |               |                             |                 |               |
| <i>B. bavariensis</i> PBi                                | RecA   | NZ_CP028872.1 |                               |        |             |        |               |                             |                 |               |
| <i>B. valisiana</i> Tom4006                              | RecA   | CP009117.1    |                               |        |             |        |               |                             |                 |               |
| <i>B. tachyglossi</i> Bc-F10-1268                        | RecA   | CP025785.1    |                               |        |             |        |               |                             |                 |               |
| <i>B. mayonii</i> MN14-1420                              | RecA   | NZ_CP015780.1 |                               |        |             |        |               |                             |                 |               |
| <i>B. mayonii</i> MN14-1539                              | RecA   | NZ_CP015796.1 |                               |        |             |        |               |                             |                 |               |

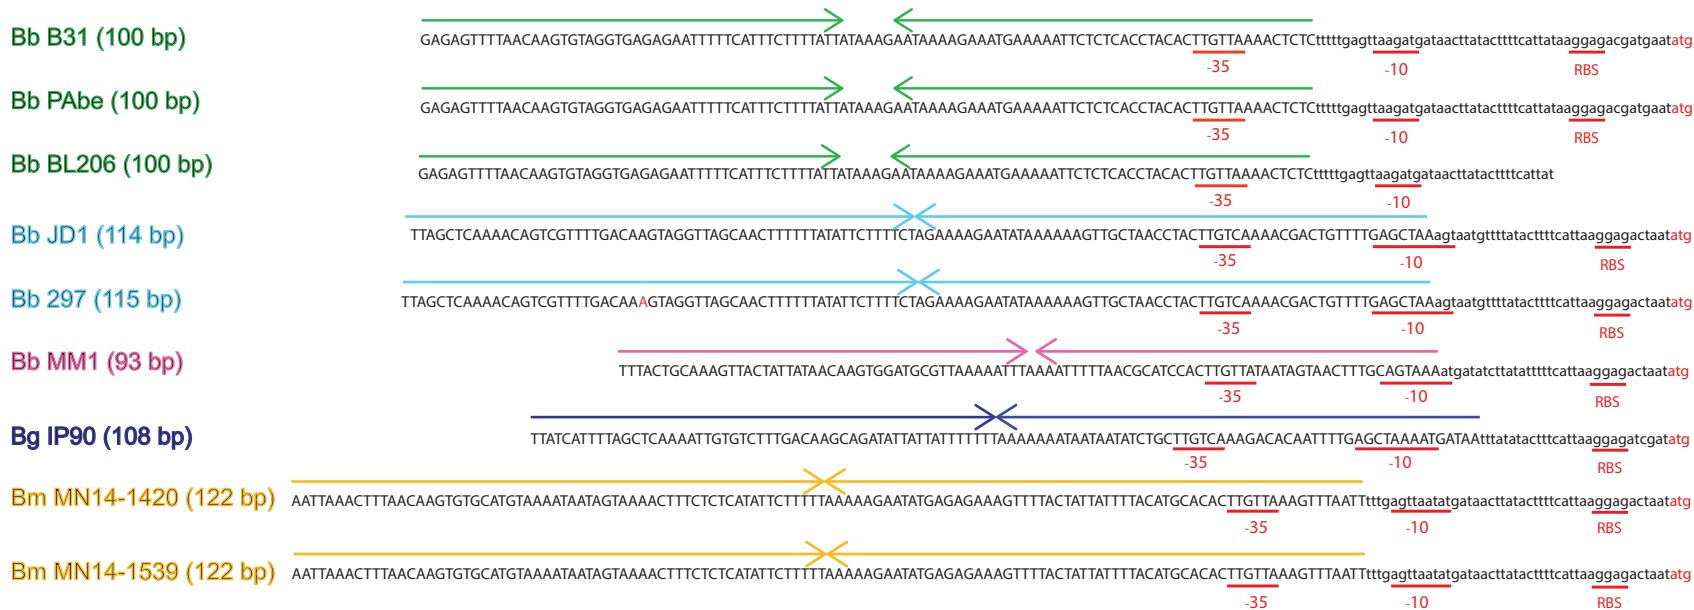

**Fig. S1. Long inverted repeats found upstream of *vlsE* in different *Borrelia* species and strains.** Arrows above the sequences represent the extent and orientation of the repeats. -35 and -10 promoter boxes are underlined in red as are the Ribosome Binding Sites and the start ATG start codon for the *vlsE* signal peptide. Arrows in the same color indicate identical inverted repeat sequences. The unpublished inverted repeats from *B. burgdorferi* strains BL206, 297 and *B. garinii* IP90 were sequenced either by DNA cycle sequencing at high temperature as noted in the text or by PacBio sequencing. Bb=*B. burgdorferi*, Bg=*B. garinii* and Bm=*B. mayonii*. Accession numbers for the sequences are listed in **Table S1**.
